# Supplementary material
Source: publisher figshare collection journal article supplement (https://acs.figshare.com/ndownloader/files/15660971)
Supplement: Supplementary file 1 [file 15660971]

# Supporting Information

## Role of Water in Suppressing Recombination Pathways in CH<sub>3</sub>NH<sub>3</sub>PbI<sub>3</sub> Perovskite Solar Cells

*Ankur Solanki<sup>1,†</sup>, Swee Sien Lim<sup>1,2,†</sup>, Subodh Mhaisalkar<sup>3,4</sup> and Tze Chien Sum<sup>1,\*</sup>*

<sup>1</sup>Division of Physics and Applied Physics, School of Physical and Mathematical Sciences,  
Nanyang Technological University, 21 Nanyang Link, Singapore 637371, Singapore

<sup>2</sup>Energy Research Institute @NTU (ERI@N), Interdisciplinary Graduate School, Nanyang  
Technological University, Singapore 637553, Singapore

<sup>3</sup>Energy Research Institute @NTU (ERI@N), Research Techno Plaza, X-Frontier Block, Level 5,  
50 Nanyang Drive, Singapore 637553, Singapore

<sup>4</sup>School of Materials Science and Engineering Nanyang Technological University Nanyang Avenue,  
Singapore 639798, Singapore

<sup>†</sup>These authors have equal contribution to this work.

\*Corresponding author. Tze Chien Sum: [Tzechien@ntu.edu.sg](mailto:Tzechien@ntu.edu.sg)

## Results

### X-ray Diffraction pattern

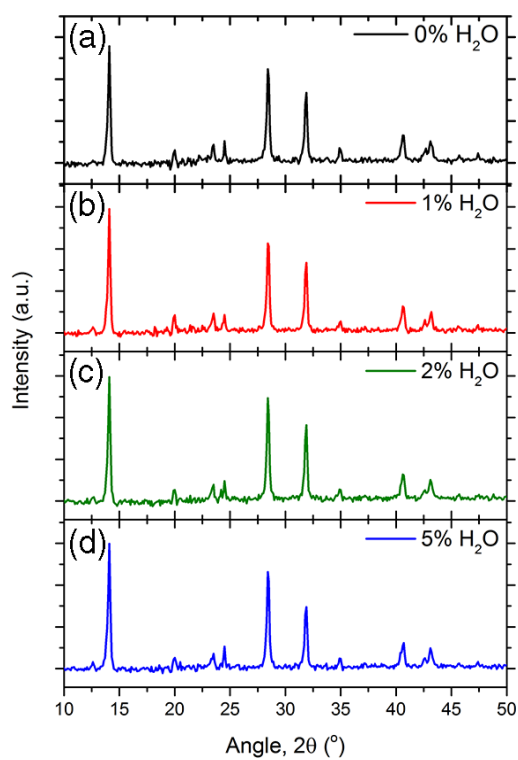

**Figure S1.** X-ray diffraction spectra of the different samples with varying H<sub>2</sub>O additive concentrations: (a) 0%, (b) 1%, (c) 2% and (d) 5 vol% H<sub>2</sub>O.

### Scanning electron microscopy images

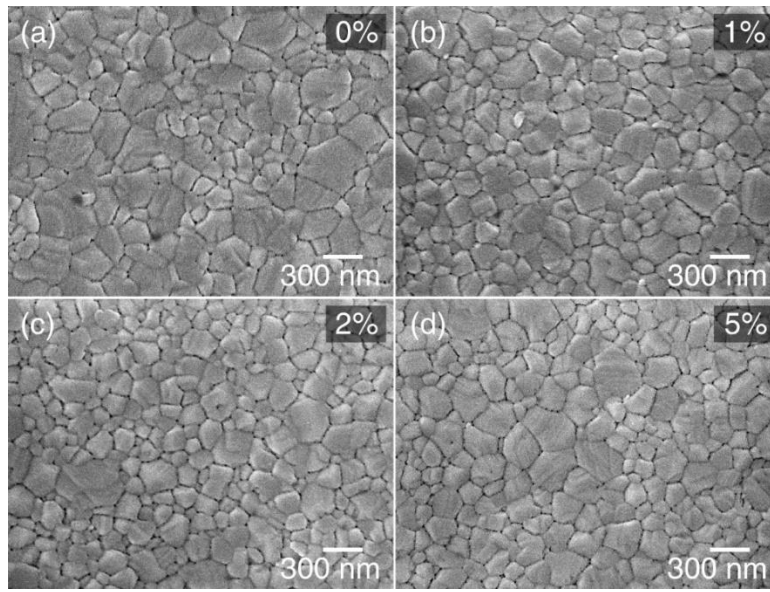

**Figure S2.** SEM images of perovskite films prepared from solutions with varying water additive concentration (a) 0%, (b) 1%, (c) 2% and (d) 5 vol% H<sub>2</sub>O; 1% indicates perovskite solution with 1 vol% H<sub>2</sub>O additive.

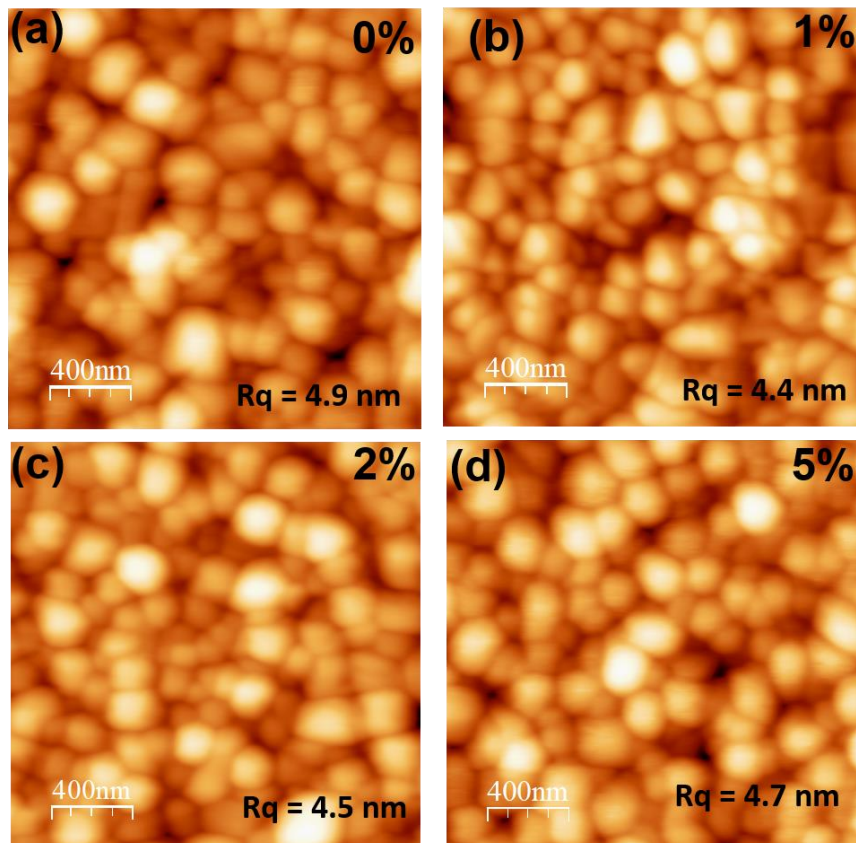

**Figure S3:** AFM images ( $2\ \mu\text{m} \times 2\ \mu\text{m}$ ) of perovskite films prepared from solutions with varying water additive concentration with root-mean-square roughnesses of the various samples: (a)  $Rq_{0\%} = 4.9\ \text{nm}$ , (b)  $Rq_{1\%} = 4.4\ \text{nm}$ , (c)  $Rq_{2\%} = 4.5\ \text{nm}$  and (d)  $Rq_{5\%} = 4.7\ \text{nm}$  for the varying vol% H<sub>2</sub>O-added perovskite films.

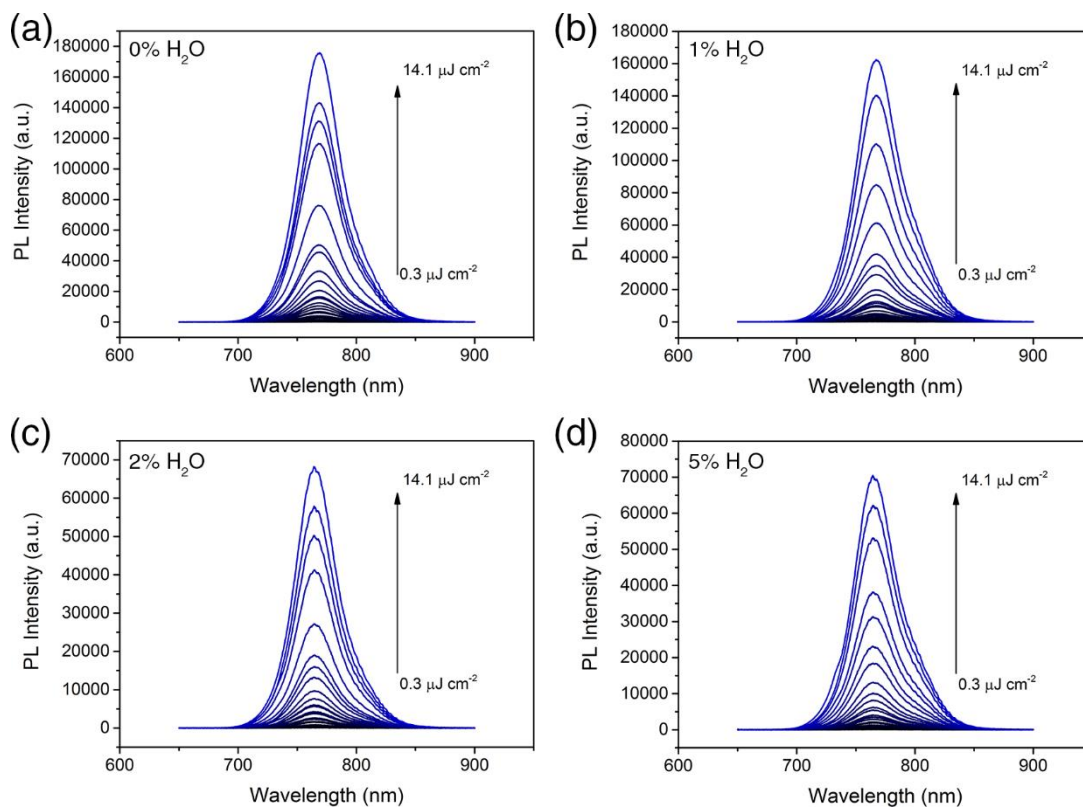

**Figure S4.** Power-dependent photoluminescence (PL) measured in the low fluence regime to extract trap densities in the perovskite films with varying H<sub>2</sub>O additive concentrations: (a) 0%, (b) 1%, (c) 2% and (d) 5 vol% H<sub>2</sub>O.

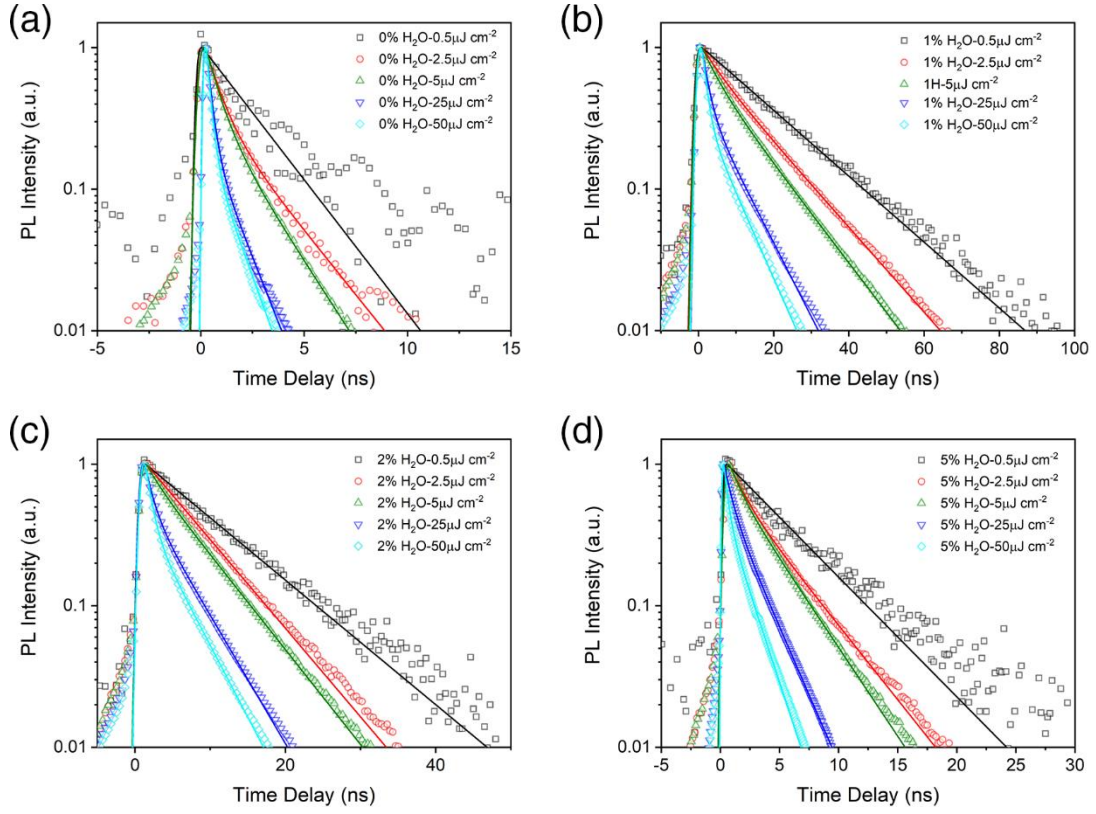

**Figure S5.** Power dependent time-resolved PL (TRPL) traces fitted with mono- or biexponential decay functions to extract the PL lifetimes and their associated amplitudes in the perovskite films with varying H<sub>2</sub>O additive concentrations: (a) 0%, (b) 1%, (c) 2% and (d) 5 vol% H<sub>2</sub>O.

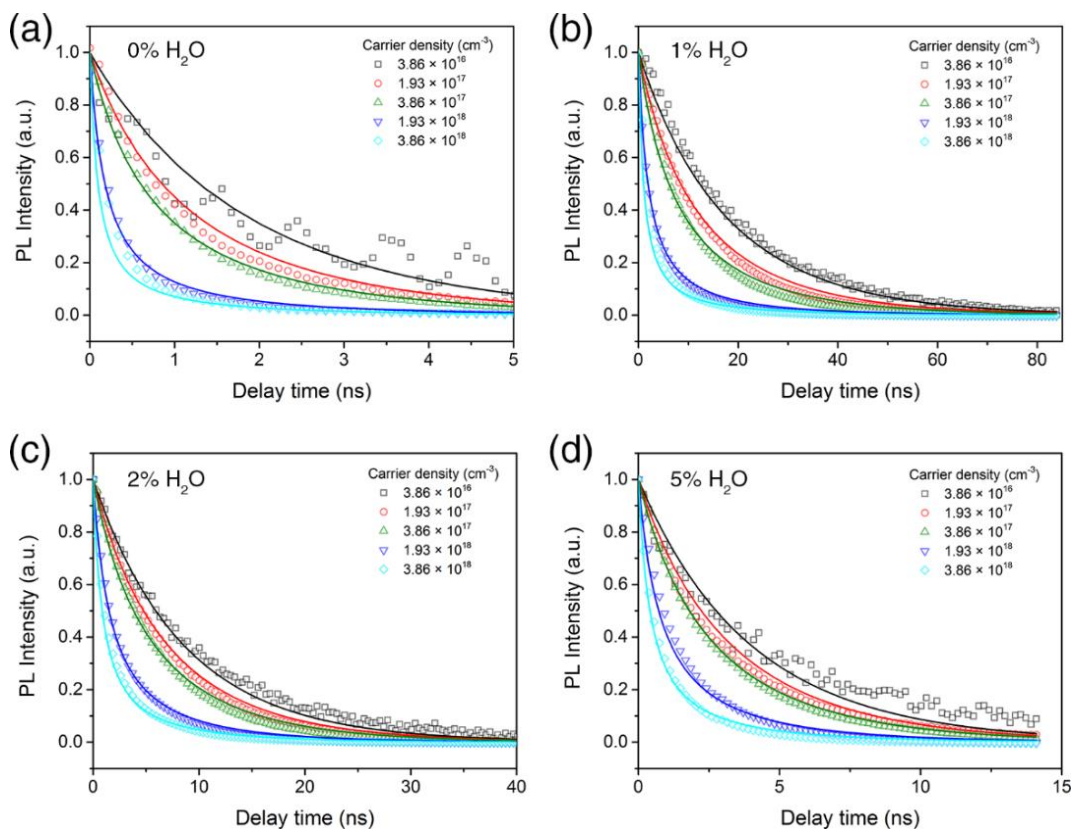

**Figure S6.** Power dependent TRPL traces fitted with the recombination rate equation (see main text) to extract the monomolecular and bimolecular recombination rate constants in the perovskite films with varying H<sub>2</sub>O additive concentrations: (a) 0%, (b) 1%, (c) 2% and (d) 5 vol% H<sub>2</sub>O.



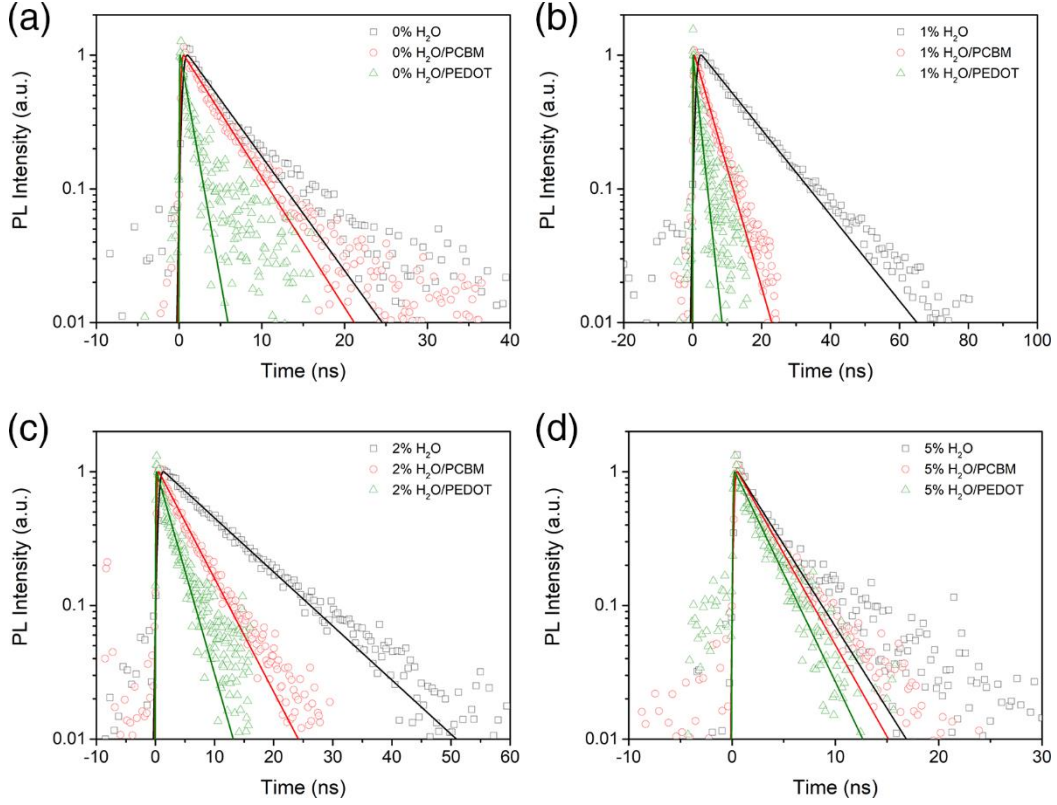

**Figure S7.** Diffusion length measurements of the in the perovskite films with varying H<sub>2</sub>O additive concentrations: (a) 0%, (b) 1%, (c) 2% and (d) 5 vol% H<sub>2</sub>O with the respective quencher (black: neat film, red: PCBM layer, green: PEDOT layer) measured at a fluence of 0.5  $\mu\text{J cm}^{-2}$ . Symbols are the data obtained from PL measurements, solid lines are exponential fits.

**Trap density calculation:** Initial photogenerated carrier density in different perovskite films were estimated using Plank Equation ( $\alpha E = nhc/\lambda$ ) (Equation S1), where  $\alpha$  is the absorption coefficient at 600 ( $=\lambda$ ) nm while  $E$ ,  $n$ ,  $h$ ,  $c$  are excitation pump fluence, charge carrier density, plank constant and light velocity, respectively.  $\alpha$  is calculated using equation  $\alpha = I/L$  (Equation S2) where  $I$  is the absolute absorption intensity at 600 nm and  $L$  represents the film thickness ( $\sim 275$  nm). In order to estimate the defects density, the integrated steady state PL intensity for the different perovskite films was fitted with the model:

$$n_c(0) = \sum n_{TP}(0)(1 - e^{-k_1 I_{PL}}) + k_2 I_{PL} \quad \text{Equation S3}$$

where  $n_c(0)$  and  $n_{TP}$  represent photogenerated charge carrier density and trap density, respectively while  $k_1$ ,  $k_2$  are the constants.

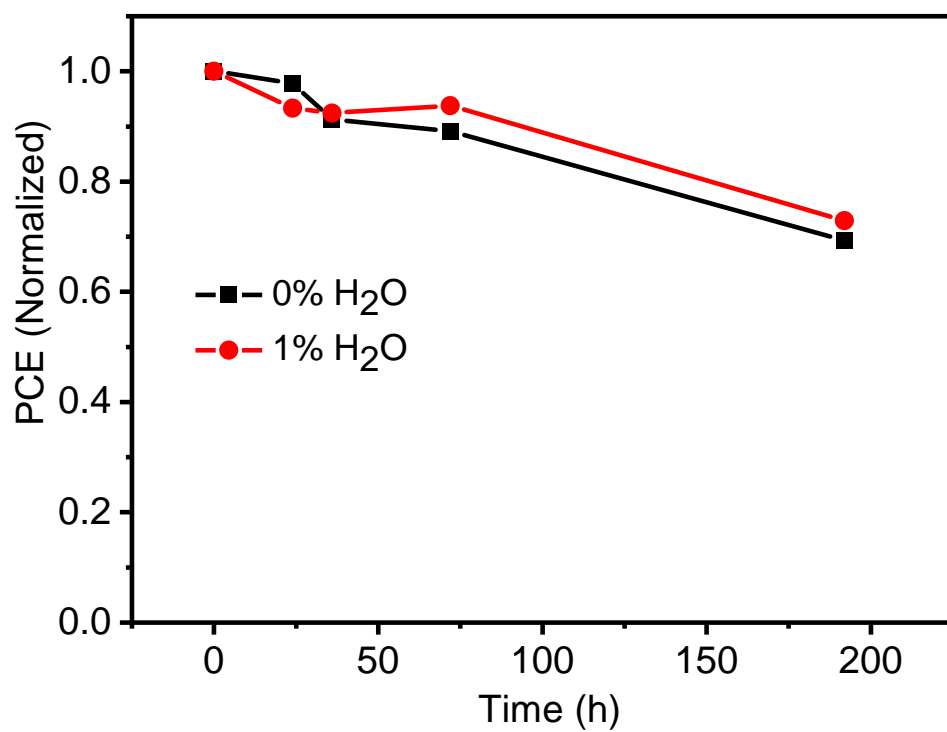

**Figure S8:** Comparative study of device degradation of 0% and 1% H<sub>2</sub>O added solar cell devices.
